# Supplementary material
Source: Springer Nature journal article supplement (https://www.springermedizin.de/resource/supplementary/12936_2012_2146_MOESM4_ESM.pdf/9542668)

### Household ownership

### Usage children <5 years

### Household ownership

### Usage children <5 years

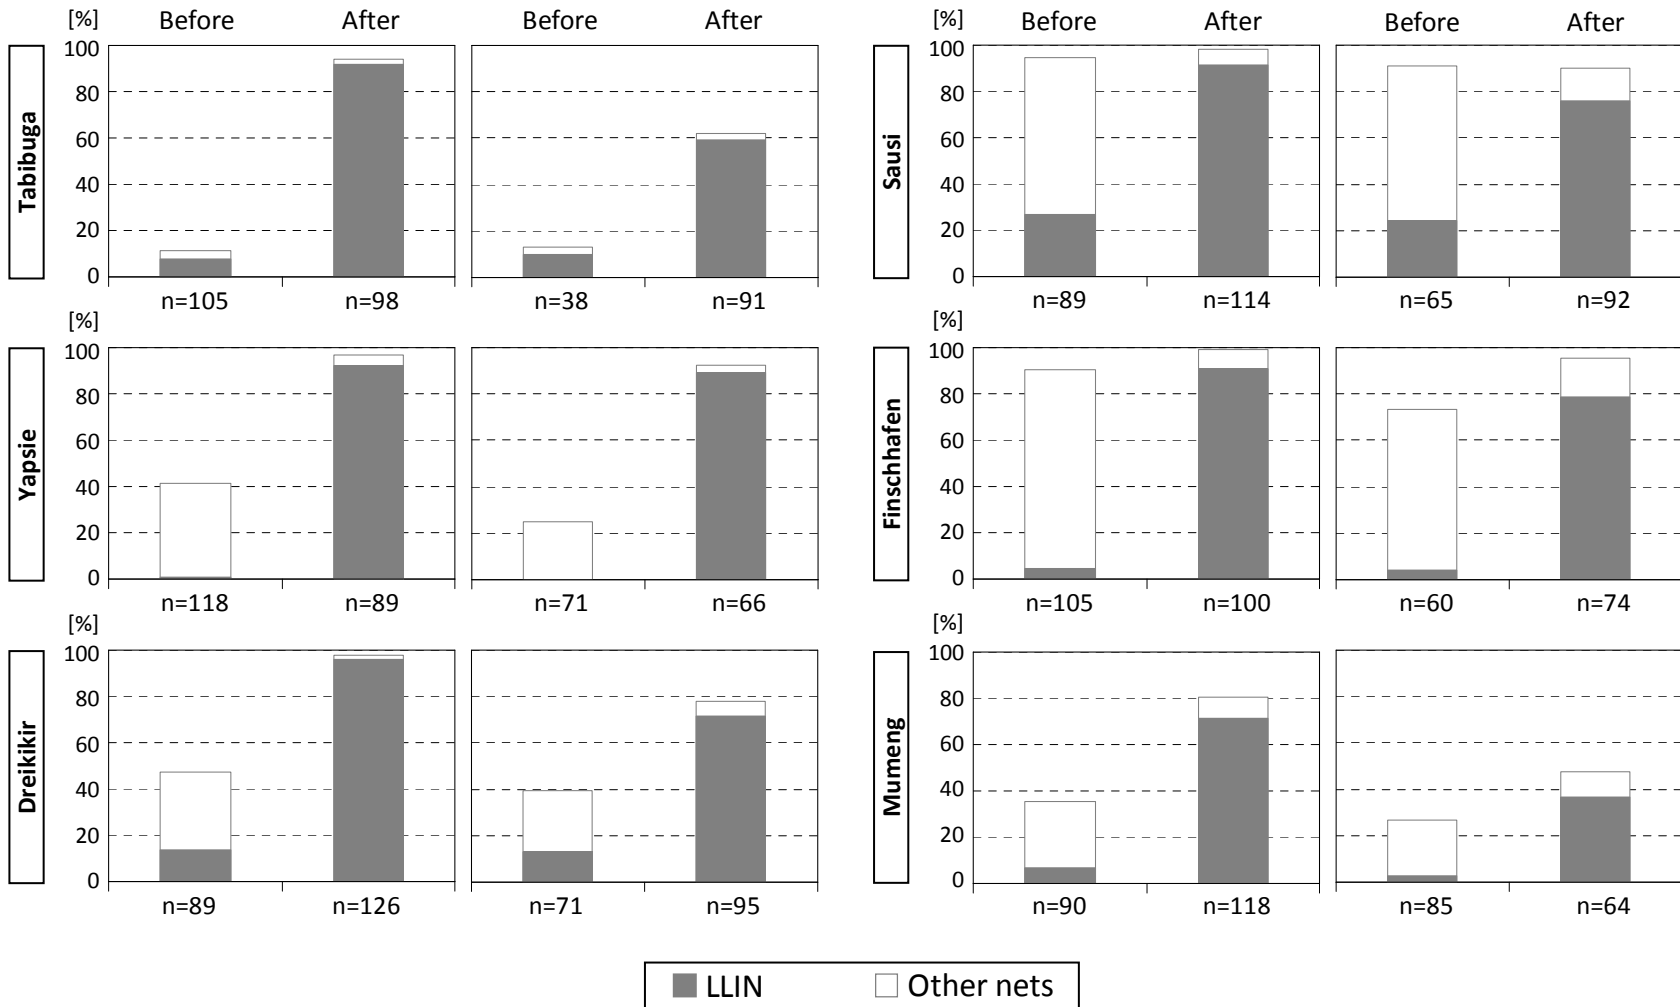

Supplement: MOESM4 [file 9542668]
